# Supplementary material for: Uncovering the Role of Hydroxycinnamoyl Transferase in Boosting Chlorogenic Acid Accumulation in Carthamus tinctorius Cells under Methyl Jasmonate Elicitation
Source: MDPI journal article supplement (doi:10.3390/ijms25052710), 2024-02-27
Supplement: s1 [file s1]

## Supplementary Material

### Table

**Table S1** Statistical analysis of transcriptome sequencing data

| <b>Samples</b> | <b>Clean reads</b> | <b>Q30<sup>1</sup></b> | <b>Mapped Reads</b> |
|----------------|--------------------|------------------------|---------------------|
| CK-1           | 23,190,564         | 92.95%                 | 91.51%              |
| CK-2           | 23,398,129         | 92.97%                 | 92.37%              |
| CK-3           | 28,549,311         | 92.42%                 | 90.86%              |
| MJ-1           | 25,432,291         | 93.56%                 | 92.57%              |
| MJ-2           | 25,783,350         | 92.95%                 | 92.15%              |
| MJ-3           | 25,268,504         | 93.70%                 | 92.06%              |

<sup>1</sup>Q30 represents reads with a sequence accuracy greater than 99.99%; Mapped Reads represents reads annotated on the reference genome.

**Table S2** Primers used in qRT-PCR and vectors construction

| Primers                   | Primers' application | Primers sequences (5'→3')                 |
|---------------------------|----------------------|-------------------------------------------|
| <i>DAD1-F</i>             | qRT-PCR              | GACATCTCGAGGATCTGGCG                      |
| <i>DAD1-R</i>             |                      | TGAGCAAACCTCGCCGTACTT                     |
| <i>LOX2S-F</i>            |                      | CGCCTACTCTCCGGTCATTC                      |
| <i>LOX2S-R</i>            |                      | CGGTTGGTTGGACGGTGATA                      |
| <i>JAZ-F</i>              |                      | GGAAACGCATCTTGGCAGTG                      |
| <i>JAZ-R</i>              |                      | TGTCCTCACGTTGCAATGA                       |
| <i>MYC2-F</i>             |                      | GGAGTTCAACGAACAACGGC                      |
| <i>MYC2-R</i>             |                      | CGTCGAGATCTGAGTGGTCG                      |
| <i>aroDE-F</i>            |                      | TCATTGAGTAACGTGCCGCT                      |
| <i>aroDE-R</i>            |                      | GCACTGCCCCGTTTCAAAT                       |
| <i>GOT1-F</i>             |                      | CCAAACGCCCCCTAAGTGAT                      |
| <i>GOT1-R</i>             |                      | ACGCCTACACGCCCATAAAA                      |
| <i>C4H-F</i>              |                      | AAAGGGCAGGACATGGTGTT                      |
| <i>C4H-R</i>              |                      | TGTTCTGTGAAAAACGGCACC                     |
| <i>4CL-F</i>              |                      | ACCAACCCGGTGAGATATGC                      |
| <i>4CL-R</i>              |                      | CAGTGTGAAGCCAACCTTGC                      |
| <i>HCT-F</i>              |                      | GTTGACCCGAGAGCAACTCA                      |
| <i>HCT-R</i>              |                      | TGTACAGCTTGCTGTCCTGG                      |
| <i>CSE-F</i>              |                      | GCACATTCCACGTCAACCAC                      |
| <i>CSE-R</i>              |                      | CGTGATCGAGTTGCTCCTGA                      |
| <i>CCoAOMT-F</i>          |                      | GAAAACCGATCACATGGCGG                      |
| <i>CCoAOMT-R</i>          |                      | TAGCTCTTTCATGGGTGCCG                      |
| <i>COMT-F</i>             |                      | TGCAAATGCGTTGTCGATCC                      |
| <i>COMT-R</i>             |                      | ACCCTGTTGTGTGCAAGTGA                      |
| <i>ubiquitin C-F</i>      |                      | CAGCAACACCCCCTTTACTCT                     |
| <i>ubiquitin C-R</i>      |                      | AGGATGGAAATCGGGGTGGA                      |
| <i>35S:: CtHCT-eGFP-F</i> | Vector construction  | ACGCGTCCCGGGGCGGTACCATGAAGATCGCCGTGACAGA  |
| <i>35S:: CtHCT-eGFP-R</i> |                      | AGCTCTGCAGGTCGACTTAGATATCGTACAAGAACTTGCT  |
| <i>pET28a (+)-CtHCT-F</i> |                      | AATGGGTCGCGGATCCATGAAGATCGCCGTGACAGA      |
| <i>pET28a (+)-CtHCT-R</i> |                      | TGCTCGAGTGCGGCCGCTTAGATATCGTACAAGAACTTGCT |

# Figures

Figure S1

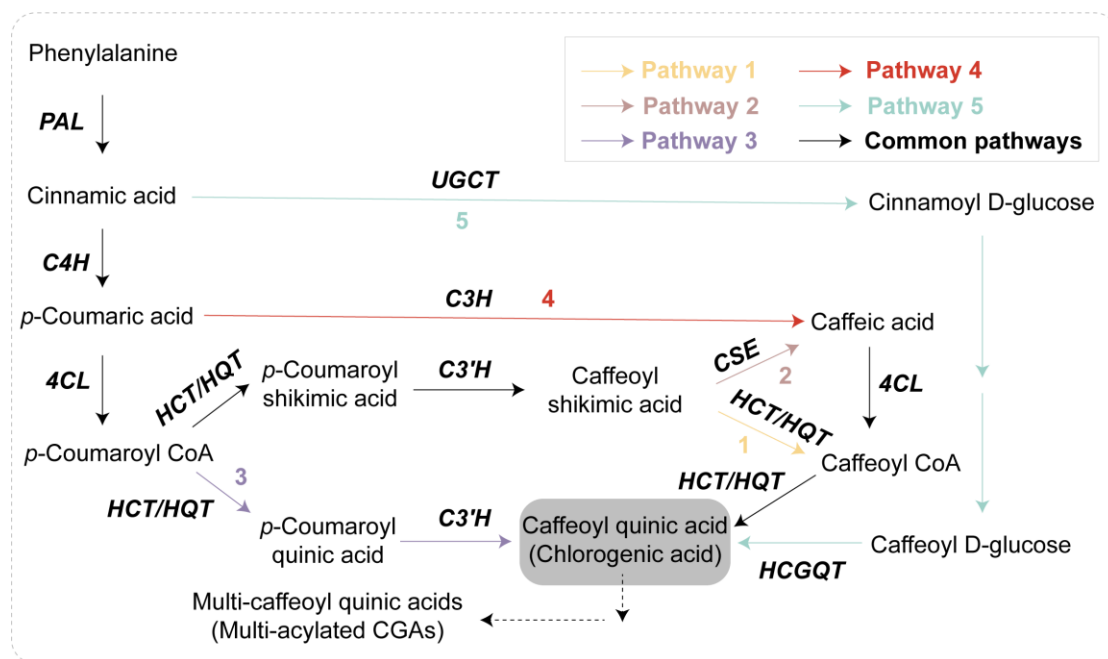

Figure S1 Biosynthetic pathways of chlorogenic acid in plants.

Figure S2

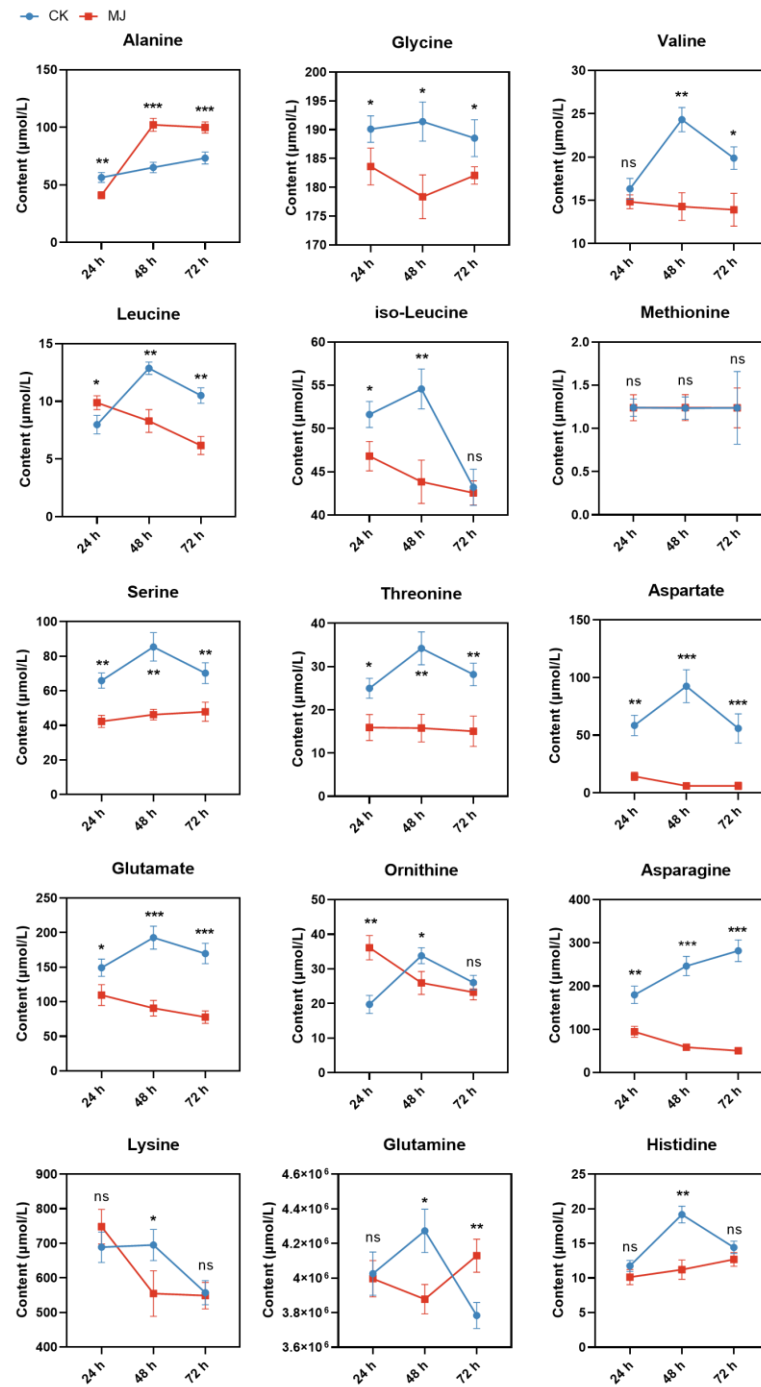

Figure S2 Temporal changes of amino acid in MJ-treated *C. tinctorius* cells.

Figure S3

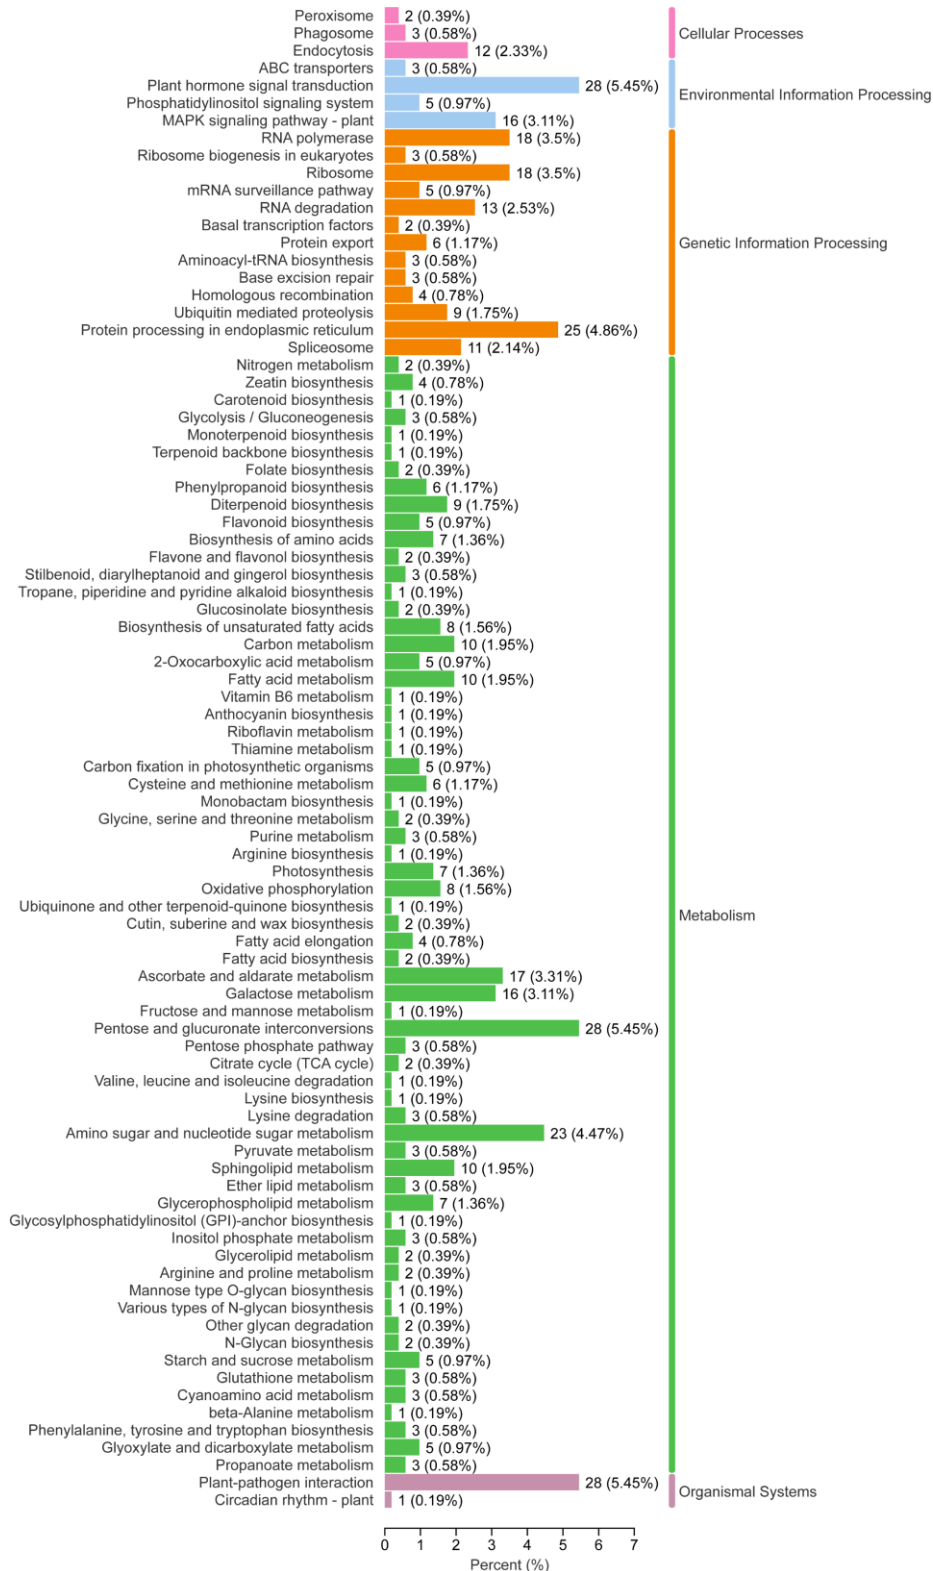

Figure S3 KEGG pathway annotation of new genes from *C. tinctorius* cells.

Figure S4

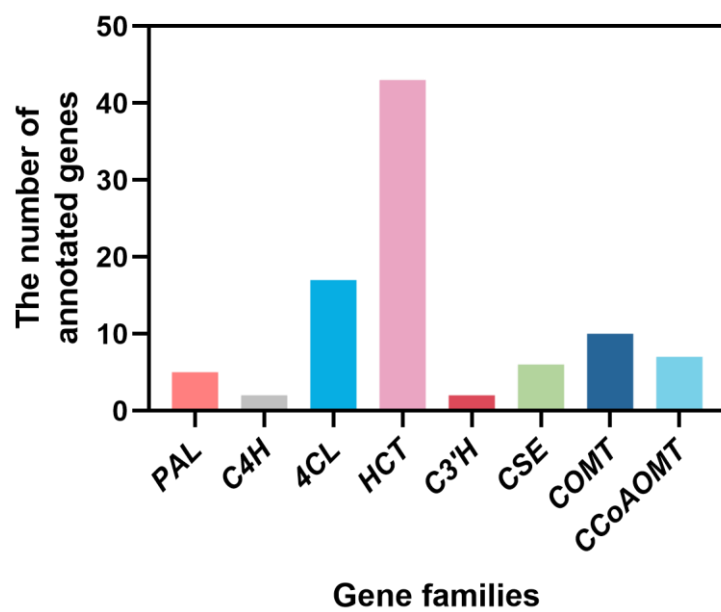

**Figure S4** The annotation results of gene families involved in CGAs biosynthesis pathway in *C. tinctorius* cells.

Figure S5

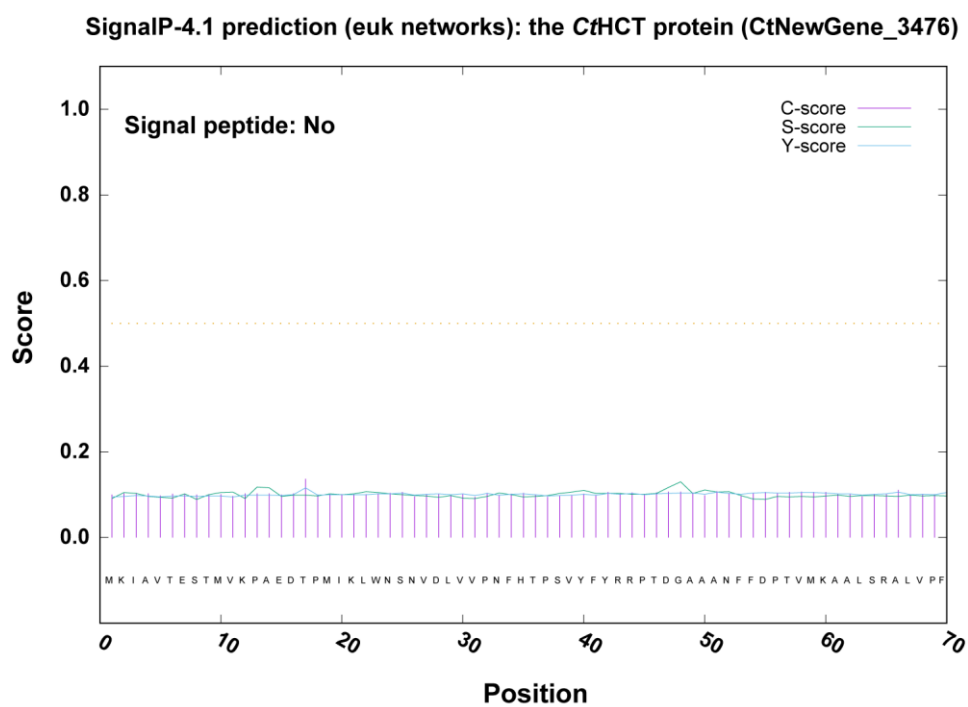

**Figure S5** Signal peptide prediction (<https://services.healthtech.dtu.dk/services/SignalP-4.1/>) of the *CtHCT* protein (CtNewGene 3476)

**Figure S6**

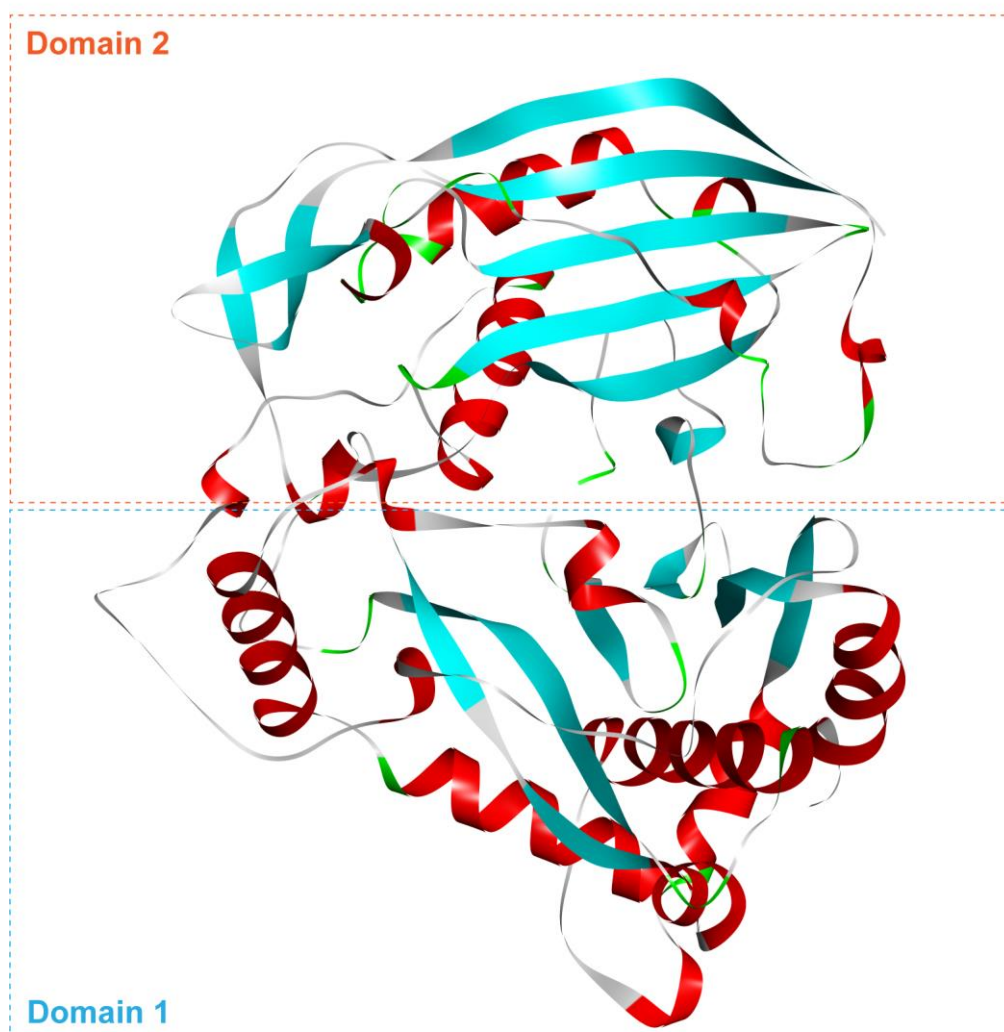

**Figure S6** Protein structure prediction of the CtHCT protein (CtNewGene 3476) through homologous modeling.
